# Supplementary material
Source: publisher figshare collection journal article supplement (https://asha.figshare.com/articles/dataset/_/17776211)
Supplement: Supplementary file 1 [file 1]

**Supplemental Material S2.** Template for conducting generative naming probes.

## AbSANT Probe

Client: \_\_\_\_\_

Category: \_\_\_\_\_

Date: \_\_\_\_\_

| Abstract<br>Target Words | Response | Correct /<br>Incorrect<br>(1/0) | Other<br>Abstract<br>Responses | Concrete Words<br>(Generalization) | Response | Correct /<br>Incorrect<br>(1/0) | Other<br>Concrete<br>Responses |
|--------------------------|----------|---------------------------------|--------------------------------|------------------------------------|----------|---------------------------------|--------------------------------|
|                          |          |                                 |                                |                                    |          |                                 |                                |
|                          |          |                                 |                                |                                    |          |                                 |                                |
|                          |          |                                 |                                |                                    |          |                                 |                                |
|                          |          |                                 |                                |                                    |          |                                 |                                |
|                          |          |                                 |                                |                                    |          |                                 |                                |
|                          |          |                                 |                                |                                    |          |                                 |                                |
|                          |          |                                 |                                |                                    |          |                                 |                                |
|                          |          |                                 |                                |                                    |          |                                 |                                |
|                          |          |                                 |                                |                                    |          |                                 |                                |
|                          |          |                                 |                                |                                    |          |                                 |                                |
| Number                   |          |                                 |                                | Number                             |          |                                 |                                |
| Percent                  |          |                                 |                                | Percent                            |          |                                 |                                |

Notes:
