# Supplementary material
Source: publisher figshare collection journal article supplement (https://asha.figshare.com/articles/dataset/_/17776211)
Supplement: Supplementary file 2 [file 1]

|                        |                        |
|------------------------|------------------------|
| [personalized feature] | [personalized feature] |
| [personalized feature] |                        |

Supplemental material, Sandberg, "Tutorial for Abstract Semantic Associative Network Training (AbsANT): Theoretical Rationale, Step-by-Step Protocol, and Material Resources," *Perspectives*, [https://doi.org/10.1044/2021\\_PERSP-21-00176](https://doi.org/10.1044/2021_PERSP-21-00176)

**Supplemental Material S6.** Template for personalized feature cards.
