# Supplementary material
Source: publisher figshare collection journal article supplement (https://asha.figshare.com/articles/dataset/_/17776211)
Supplement: Supplementary file 3 [file 1]

|                    |                    |                    |
|--------------------|--------------------|--------------------|
| [CATEGORY 1]       | [abstract<br>word] | [abstract<br>word] |
| [abstract<br>word] | [abstract<br>word] | [abstract<br>word] |
| [abstract<br>word] | [abstract<br>word] | [abstract<br>word] |
| [abstract<br>word] | [abstract<br>word] | [concrete<br>word] |

[concrete  
word]

[CATEGORY 2]

[abstract  
word]

[concrete  
word]

[concrete  
word]

[concrete  
word]

[concrete  
word]

|                    |                    |                    |
|--------------------|--------------------|--------------------|
| [concrete<br>word] | [concrete<br>word] | [concrete<br>word] |
| [concrete<br>word] | [concrete<br>word] | [concrete<br>word] |

Supplemental material, Sandberg, "Tutorial for Abstract Semantic Associative Network Training (AbsANT): Theoretical Rationale, Step-by-Step Protocol, and Material Resources," *Perspectives*, [https://doi.org/10.1044/2021\\_PERSP-21-00176](https://doi.org/10.1044/2021_PERSP-21-00176)

**Supplemental Material S3.** Template for word cards.
