# Supplementary material
Source: publisher figshare collection journal article supplement (https://asha.figshare.com/articles/dataset/_/17776211)
Supplement: Supplementary file 4 [file 1]

|                   |                         |
|-------------------|-------------------------|
| builds a nest     | comes out of a cocoon   |
| has feathers      | spins a web             |
| lives in trees    | is put in a salad       |
| found in a garden | lives in the water      |
| is furry          | grows in soil           |
| has a tail        | has six feet            |
| used to cut paper | used to plow the fields |
| can fly           |                         |
