# Supplementary material
Source: publisher figshare collection journal article supplement (https://asha.figshare.com/articles/dataset/_/17776211)
Supplement: Supplementary file 5 [file 1]

**Supplemental Material S9.** Template for Step 5.

## AbSANT Step 5

Client: \_\_\_\_\_ Category: \_\_\_\_\_ Date: \_\_\_\_\_

## Free Generative Naming

[illegible]

Notes:
