# Supplementary material
Source: publisher figshare collection journal article supplement (https://asha.figshare.com/articles/dataset/_/17776211)
Supplement: Supplementary file 6 [file 1]

|                                        |                               |
|----------------------------------------|-------------------------------|
| exists only in the mind                | has a physical presence       |
| exists outside the mind                | an object                     |
| can be seen                            | is alive                      |
| can be heard                           | a feeling or emotion          |
| can be touched                         | an idea                       |
| can be tasted                          | generally considered positive |
| can be perceived                       | generally considered negative |
| different meaning for different people |                               |

Supplemental material, Sandberg, "Tutorial for Abstract Semantic Associative Network Training (AbsANT): Theoretical Rationale, Step-by-Step Protocol, and Material Resources," *Perspectives*, [https://doi.org/10.1044/2021\\_PERSP-21-00176](https://doi.org/10.1044/2021_PERSP-21-00176)

**Supplemental Material S4.** General feature cards.
