# Supplementary material
Source: publisher figshare collection journal article supplement (https://asha.figshare.com/articles/dataset/_/17776211)
Supplement: Supplementary file 7 [file 1]

[illegible]

Unrelated Features (choose 5)

|                                |     |     |     |     |     |     |     |
|--------------------------------|-----|-----|-----|-----|-----|-----|-----|
| Does it build a nest?          | Y N | Y N | Y N | Y N | Y N | Y N | Y N |
| Does it have feathers?         | Y N | Y N | Y N | Y N | Y N | Y N | Y N |
| Does it live in trees?         | Y N | Y N | Y N | Y N | Y N | Y N | Y N |
| Is it poisonous?               | Y N | Y N | Y N | Y N | Y N | Y N | Y N |
| Is it furry?                   | Y N | Y N | Y N | Y N | Y N | Y N | Y N |
| Is it put on windows?          | Y N | Y N | Y N | Y N | Y N | Y N | Y N |
| Is it used to cut paper?       | Y N | Y N | Y N | Y N | Y N | Y N | Y N |
| Is it made of leather?         | Y N | Y N | Y N | Y N | Y N | Y N | Y N |
| Does it come out of a cocoon?  | Y N | Y N | Y N | Y N | Y N | Y N | Y N |
| Does it spin a web?            | Y N | Y N | Y N | Y N | Y N | Y N | Y N |
| Is it crunchy?                 | Y N | Y N | Y N | Y N | Y N | Y N | Y N |
| Does it live in the water?     | Y N | Y N | Y N | Y N | Y N | Y N | Y N |
| Does it grow in soil?          | Y N | Y N | Y N | Y N | Y N | Y N | Y N |
| Does it have six feet?         | Y N | Y N | Y N | Y N | Y N | Y N | Y N |
| Is it used to plow the fields? | Y N | Y N | Y N | Y N | Y N | Y N | Y N |

### Type, Synonym, Recall

| Date:                    |   |   |   |   |   |   |   |   |
|--------------------------|---|---|---|---|---|---|---|---|
| Abstract or concrete?    | A | C | A | C | A | C | A | C |
| What is a synonym?       |   |   |   |   |   |   |   |   |
| Accurate on word recall? | Y | N | Y | N | Y | N | Y | N |

Notes:
